# Supplementary material for: Exploring the Metabolic Effects of a Herbal Remedy of Asarum sieboldii, Platycodon grandiflorum, and Cinnamomum cassia Extracts: Unraveling Its Therapeutic Potential as a Topical Application for Atopic Dermatitis Treatment
Source: MDPI journal article supplement (doi:10.3390/antiox13050563), 2024-05-02
Supplement: s1 [file s1]

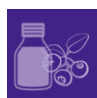

## Supplementary Materials

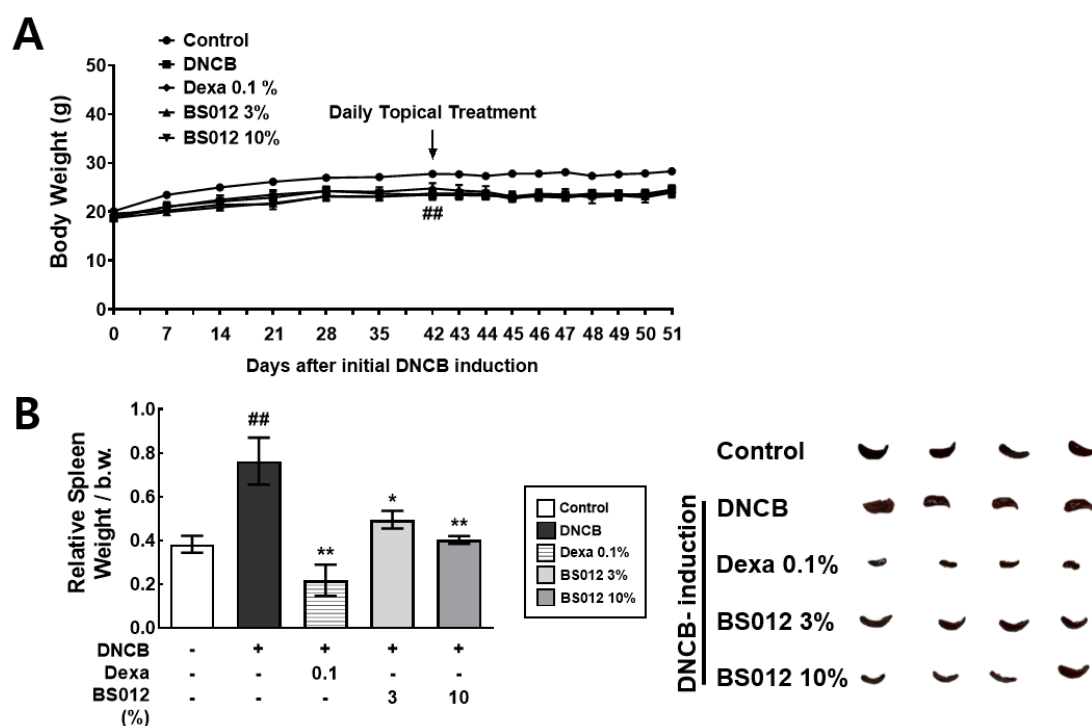

Figure S1. Relative spleen weight. The graphs represent mean  $\pm$  SEM,  $n = 6$ ; ## $p < 0.01$  vs. control group; \* $p < 0.05$ , \*\* $p < 0.01$  vs. DNCB group, Dexa: Dexamethasone.

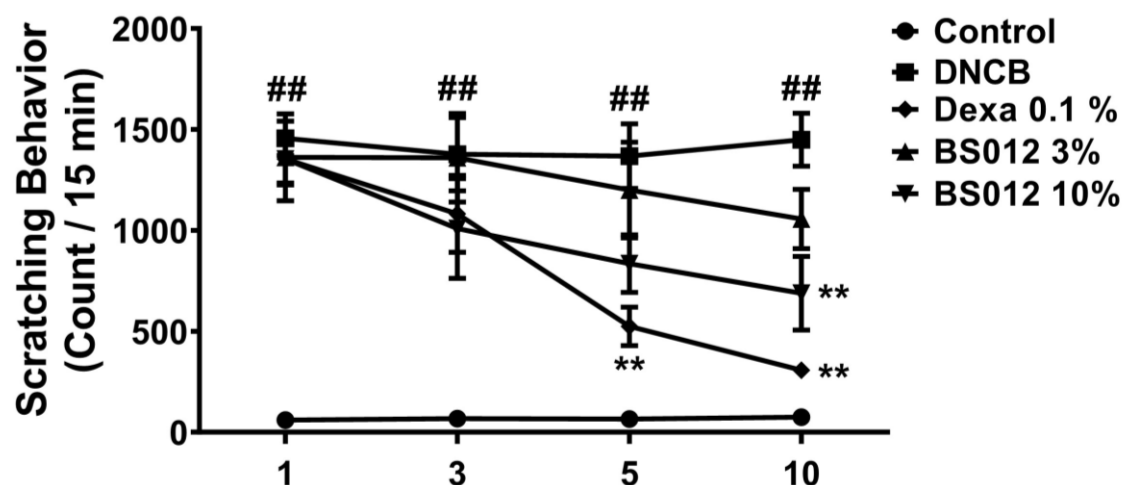

Figure S2. Effect of BS012 on the scratching behavior in NC/Nga mice (A) Total scratching behavior. Scratching behavior was quantified on days 1, 3, 5, and 10 post-treatment. The graphs represent mean  $\pm$  SEM,  $n = 6$ ; ## $p < 0.01$  vs. control group; \*\* $p < 0.01$  vs. DNCB group, Dexa: Dexamethasone.

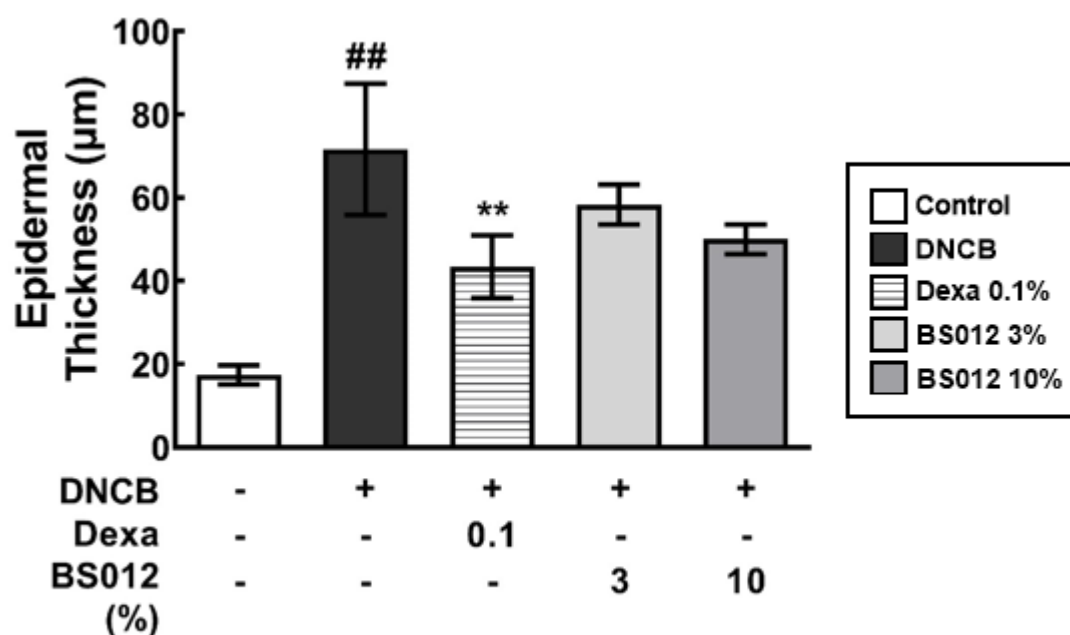

Figure S3. Effect of BS012 on the epidermal thickness in DNCB-induced NC/Nga mice. Epidermal thickness in the skin were evaluated using H&E staining. Data in the graphs are presented as mean  $\pm$  SEM. <sup>##</sup> $p < 0.01$  vs. control group; <sup>\*\*</sup> $p < 0.01$  vs. DNCB-induced group, Dexa: Dexamethasone.

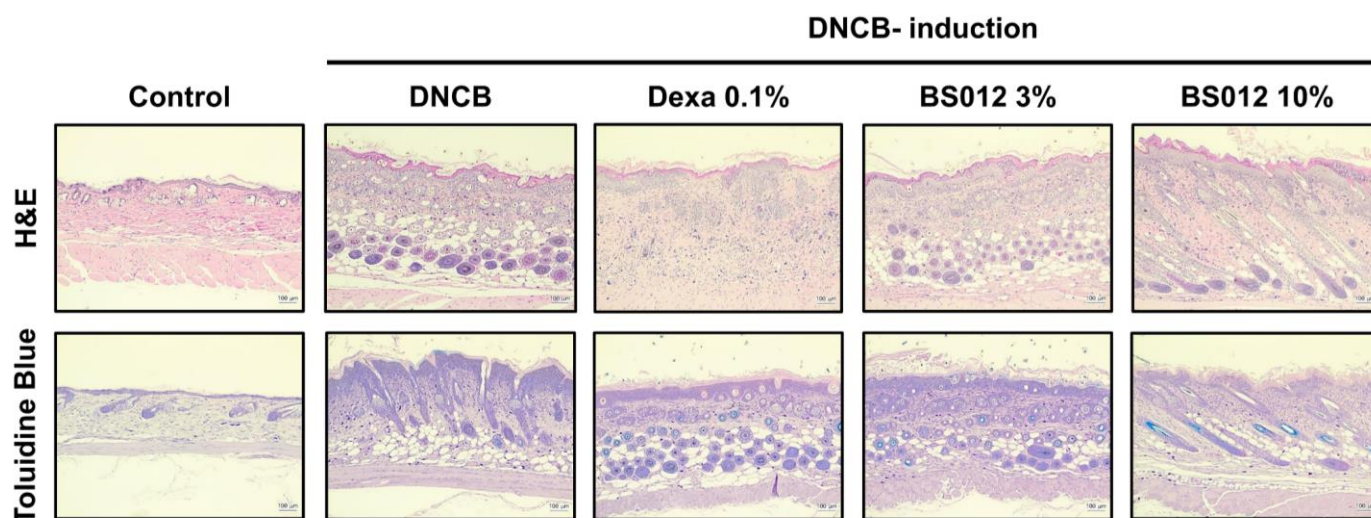

Figure S4. High-resolution original image of histological analysis. Examinations were conducted using H&E and toluidine blue staining at a magnification of 100 $\times$ .

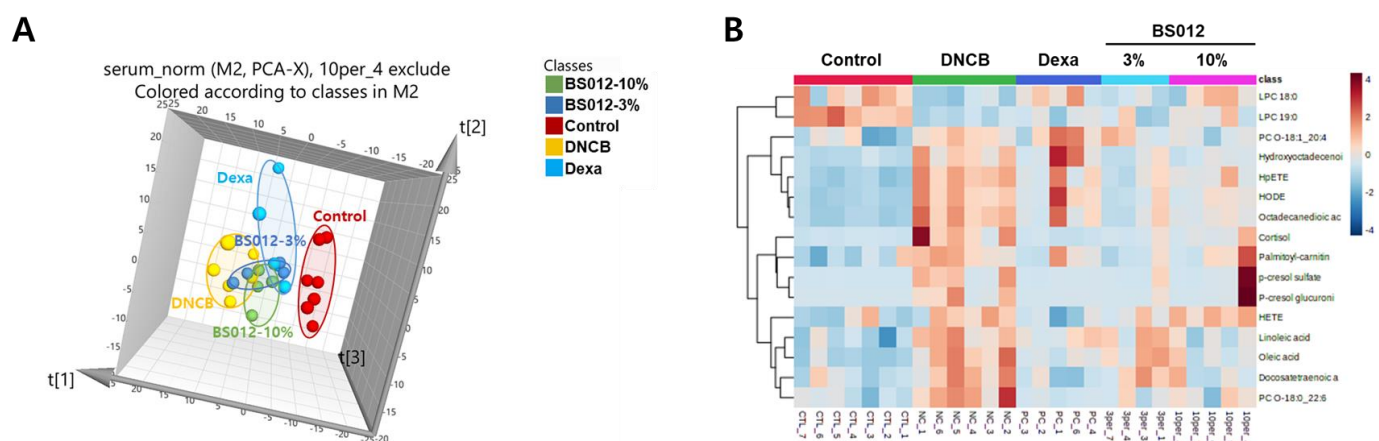

**Figure S5.** Effects of BS012 topical application on serum metabolome in DNCB-induced mice. (A) The principal component analysis (PCA) score plot derived from serum metabolomics. (B) Heatmap analysis using the 16 identified metabolites. The mean-centered relative abundances divided by the standard deviation of each variable. Dexa: Dexamethasone 0.1%.

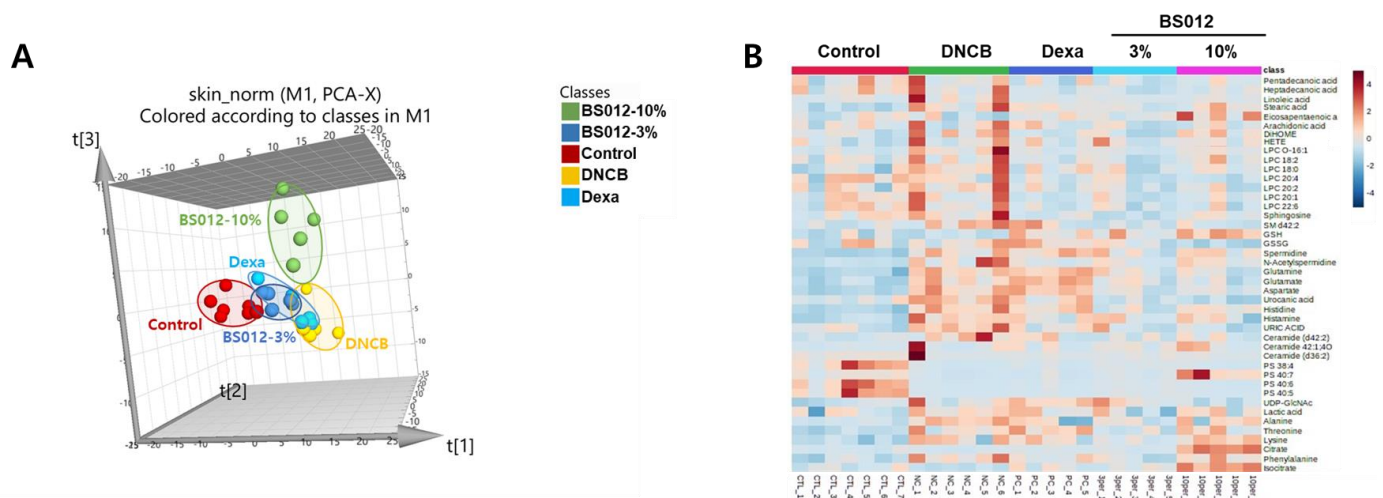

**Figure S6.** Effects of BS012 topical application on skin metabolome in DNCB-induced mice. (A) The principal component analysis (PCA) score plot derived from serum metabolomics. (B) Heatmap analysis using the 43 identified metabolites. The mean-centered relative abundances divided by the standard deviation of each variable. Dexa: Dexamethasone.

**Table S1.** List of identified metabolites significantly altered in serum from DNCB-induced mice with topical BS012 treatment.

| Related metabolism              | Identified metabolite    | (ionization mode)<br>Observed m/z | Mean value <sup>a</sup> |       |           |       |       | Trend <sup>b</sup><br>Control vs. DNCB <sup>d</sup> | Chage trend <sup>c</sup> |     |     |
|---------------------------------|--------------------------|-----------------------------------|-------------------------|-------|-----------|-------|-------|-----------------------------------------------------|--------------------------|-----|-----|
|                                 |                          |                                   | Control                 | DNCB  | BS012 (%) |       | Dexa  |                                                     | DNCB vs. treated group   |     |     |
|                                 |                          |                                   |                         |       | BS012 (%) |       |       |                                                     | Dexa                     |     |     |
|                                 |                          |                                   |                         |       | 3         | 10    |       |                                                     |                          |     |     |
| Fatty acid metabolism           | Linoleic acid            | (-) 279.231                       | 0.183                   | 0.312 | 0.296     | 0.224 | 0.259 | ↑**                                                 | ↓                        | ↓*  | ↓   |
|                                 | Oleic acid               | (-) 281.247                       | 0.061                   | 0.174 | 0.156     | 0.108 | 0.100 | ↑**                                                 | ↓                        | ↓*  | ↓** |
|                                 | HODE                     | (-) 295.226                       | 0.036                   | 0.224 | 0.109     | 0.133 | 0.197 | ↑**                                                 | ↓                        | ↓** | ↓   |
|                                 | Hydroxyoctadecenoic acid | (-) 297.241                       | 0.025                   | 0.121 | 0.057     | 0.053 | 0.138 | ↑**                                                 | ↓*                       | ↓** | ↑   |
|                                 | Octadecanedioic acid     | (-) 313.236                       | 0.029                   | 0.163 | 0.077     | 0.087 | 0.114 | ↑**                                                 | ↓*                       | ↓** | ↓   |
|                                 | HETE                     | (-) 319.226                       | 2.640                   | 3.251 | 2.976     | 3.433 | 2.520 | ↑*                                                  | ↓                        | ↓   | ↓*  |
|                                 | Docosatetraenoic acid    | (-) 331.262                       | 0.023                   | 0.041 | 0.036     | 0.027 | 0.019 | ↑**                                                 | ↓                        | ↓   | ↓** |
|                                 | HpETE                    | (-) 381.222                       | 0.004                   | 0.015 | 0.008     | 0.010 | 0.011 | ↑**                                                 | ↓**                      | ↓*  | ↓   |
| Glycero-phospholipid metabolism | LPC 18:0                 | (-) 568.357                       | 0.279                   | 0.135 | 0.174     | 0.246 | 0.255 | ↓**                                                 | ↑                        | ↑   | ↑*  |
|                                 | LPC 19:0                 | (-) 582.372                       | 0.084                   | 0.038 | 0.044     | 0.056 | 0.046 | ↓**                                                 | ↑                        | ↑*  | ↑   |
|                                 | PC O-18:1_20:4           | (-) 838.592                       | 0.004                   | 0.006 | 0.006     | 0.005 | 0.007 | ↑*                                                  | ↓                        | ↓*  | ↑   |

|        |                      |             |       |       |       |       |       |     |    |   |     |
|--------|----------------------|-------------|-------|-------|-------|-------|-------|-----|----|---|-----|
|        | PC O-18:0_22:6       | (-) 864.608 | 0.006 | 0.010 | 0.006 | 0.007 | 0.006 | ↑** | ↓* | ↓ | ↓** |
| Others | Palmitoyl-carnitine  | (+) 400.342 | 0.033 | 0.065 | 0.039 | 0.059 | 0.051 | ↑** | ↓* | ↓ | ↓   |
|        | p-Cresol sulfate     | (-) 187.006 | 0.005 | 0.984 | 0.249 | 0.876 | 0.052 | ↑** | ↓* | ↓ | ↓*  |
|        | p-Cresol glucuronide | (+) 302.122 | 0.000 | 0.003 | 0.001 | 0.003 | 0.000 | ↑** | ↓* | ↑ | ↓*  |
|        | Cortisol             | (-) 361.199 | 0.005 | 0.073 | 0.014 | 0.027 | 0.004 | ↑** | ↓* | ↓ | ↓** |

<sup>a</sup>Average values of relative abundance normalized by internal standard in each group. <sup>b</sup>Change trends in the DNCB group compared to the control group. <sup>c</sup>Change trends in the BS012 or dexamethasone treated group compared to the DNCB group. <sup>#</sup> $p < 0.05$ , <sup>##</sup> $p < 0.01$  vs. Control group; <sup>\*</sup> $p < 0.05$ , <sup>\*\*</sup> $p < 0.01$  vs. DNCB group, Dexa: Dexamethasone.

**Table S2.** List of identified metabolites significantly altered in skin lesions from DNCB-induced mice with topical BS012 treatment.

| Related metabolism                | Identified metabolite | (ionization mode)<br>Observed m/z | Mean value <sup>a</sup> |        |           |        |        | Trend <sup>b</sup><br>Control<br>vs.<br>DNCB <sup>d</sup> | Change trend <sup>c</sup><br>DNCB vs. treated group <sup>e</sup> |     |      |
|-----------------------------------|-----------------------|-----------------------------------|-------------------------|--------|-----------|--------|--------|-----------------------------------------------------------|------------------------------------------------------------------|-----|------|
|                                   |                       |                                   | Control                 | DNCB   | BS012 (%) |        | Dexa   |                                                           | BS012 (%)                                                        |     | Dexa |
|                                   |                       |                                   |                         |        | 3         | 10     |        |                                                           | 3                                                                | 10  |      |
|                                   |                       |                                   |                         |        |           |        |        |                                                           |                                                                  |     |      |
| Fatty acid<br>metabolism          | Pentadecanoic acid    | (-) 241.217                       | 0.0180                  | 0.0205 | 0.0128    | 0.0164 | 0.0149 | ↑                                                         | ↓*                                                               | ↓   | ↓    |
|                                   | Heptadecanoic acid    | (-) 269.249                       | 0.0678                  | 0.0810 | 0.0334    | 0.0496 | 0.0392 | ↑                                                         | ↓*                                                               | ↓   | ↓    |
|                                   | Linoleic acid         | (-) 279.232                       | 0.0010                  | 0.0037 | 0.0008    | 0.0011 | 0.0009 | ↑                                                         | ↓*                                                               | ↓   | ↓    |
|                                   | Stearic acid          | (-) 283.263                       | 0.0001                  | 0.0005 | 0.0003    | 0.0004 | 0.0004 | ↑**                                                       | ↓*                                                               | ↓   | ↓    |
|                                   | Eicosapentaenoic acid | (+) 303.233                       | 0.0086                  | 0.0062 | 0.0085    | 0.0195 | 0.0098 | ↓                                                         | ↑                                                                | ↑** | ↑    |
|                                   | Arachidonic acid      | (-) 303.232                       | 0.0084                  | 0.0125 | 0.0068    | 0.0072 | 0.0094 | ↑                                                         | ↓                                                                | ↓   | ↓    |
|                                   | DiHOME                | (-) 313.238                       | 0.0028                  | 0.0056 | 0.0022    | 0.0051 | 0.0027 | ↑                                                         | ↓*                                                               | ↓   | ↓    |
|                                   | HETE                  | (-) 319.227                       | 0.0002                  | 0.0005 | 0.0004    | 0.0003 | 0.0003 | ↑                                                         | ↓                                                                | ↓   | ↓    |
| Polyamine metabolism              | Spermidine            | (+) 147.077                       | 0.0019                  | 0.0056 | 0.0049    | 0.0051 | 0.0060 | ↑**                                                       | ↓                                                                | ↓   | ↑    |
|                                   | N-Acetylspermidine    | (+) 188.175                       | 0.0245                  | 0.3343 | 0.1219    | 0.1842 | 0.1091 | ↑**                                                       | ↓                                                                | ↓   | ↓    |
|                                   | Glutamine             | (-) 145.061                       | 0.0074                  | 0.0191 | 0.0146    | 0.0109 | 0.0199 | ↑**                                                       | ↓                                                                | ↓** | ↑    |
|                                   | Glutamate             | (-) 146.046                       | 0.0104                  | 0.0177 | 0.0141    | 0.0113 | 0.0215 | ↑**                                                       | ↓                                                                | ↓** | ↑    |
|                                   | Aspartate             | (-) 132.030                       | 0.0050                  | 0.0129 | 0.0083    | 0.0076 | 0.0135 | ↑**                                                       | ↓**                                                              | ↓** | ↑    |
| Glutathione<br>metabolism         | GSH                   | (+) 308.091                       | 0.0045                  | 0.0042 | 0.0084    | 0.0133 | 0.0107 | ↓                                                         | ↑*                                                               | ↑** | ↑**  |
|                                   | GSSG                  | (+) 613.160                       | 0.0055                  | 0.0065 | 0.0046    | 0.0019 | 0.0076 | ↑                                                         | ↓                                                                | ↓** | ↑    |
| Glycerophospholipid<br>metabolism | LPC O-16:1            | (-) 524.334                       | 0.0006                  | 0.0023 | 0.0006    | 0.0011 | 0.0007 | ↑**                                                       | ↓*                                                               | ↓   | ↓*   |
|                                   | LPC 18:2              | (+) 520.340                       | 0.0692                  | 0.1201 | 0.0430    | 0.1135 | 0.0596 | ↑                                                         | ↓*                                                               | ↓   | ↓    |
|                                   | LPC 18:0              | (-) 568.361                       | 0.0119                  | 0.0191 | 0.0127    | 0.0131 | 0.0147 | ↑**                                                       | ↓*                                                               | ↓*  | ↓    |
|                                   | LPC 20:4              | (+) 544.342                       | 0.0057                  | 0.0059 | 0.0033    | 0.0033 | 0.0036 | ↑                                                         | ↓                                                                | ↓   | ↓    |
|                                   | LPC 20:2              | (-) 592.360                       | 0.0002                  | 0.0003 | 0.0002    | 0.0002 | 0.0002 | ↑                                                         | ↓*                                                               | ↓*  | ↓    |
|                                   | LPC 20:1              | (+) 550.387                       | 0.0020                  | 0.0029 | 0.0012    | 0.0015 | 0.0010 | ↑                                                         | ↓                                                                | ↓   | ↓*   |
|                                   | LPC 22:6              | (-) 612.329                       | 0.0021                  | 0.0024 | 0.0015    | 0.0015 | 0.0015 | ↑                                                         | ↓                                                                | ↓*  | ↓    |
| Sphingolipid metabo-<br>lism      | Sphingosine           | (+) 300.291                       | 0.0345                  | 0.0570 | 0.0119    | 0.0300 | 0.0221 | ↑                                                         | ↓**                                                              | ↓   | ↓*   |
|                                   | SM d42:2              | (-) 857.675                       | 0.0015                  | 0.0070 | 0.0009    | 0.0018 | 0.0053 | ↑*                                                        | ↓**                                                              | ↓*  | ↓    |
|                                   | Ceramide (d42:2)      | (-) 692.619                       | 0.0002                  | 0.0009 | 0.0002    | 0.0005 | 0.0005 | ↑**                                                       | ↓*                                                               | ↓   | ↓    |
|                                   | Ceramide (d42:1)      | (+) 684.652                       | 0.0005                  | 0.0021 | 0.0013    | 0.0018 | 0.0010 | ↑                                                         | ↓                                                                | ↓   | ↓    |
|                                   | Ceramide (d36:2)      | (-) 622.541                       | 0.0087                  | 0.0208 | 0.0036    | 0.0022 | 0.0022 | ↑                                                         | ↓                                                                | ↓   | ↓    |
|                                   | PS 38:4               | (-) 810.531                       | 0.0486                  | 0.0020 | 0.0077    | 0.0025 | 0.0040 | ↓**                                                       | ↑**                                                              | ↑   | ↑    |
|                                   | PS 40:7               | (-) 832.515                       | 0.0045                  | 0.0009 | 0.0022    | 0.0179 | 0.0013 | ↓**                                                       | ↑*                                                               | ↑** | ↑    |
|                                   | PS 40:6               | (+) 836.544                       | 0.0282                  | 0.0007 | 0.0031    | 0.0011 | 0.0019 | ↓**                                                       | ↑**                                                              | ↑   | ↑    |
|                                   | PS 40:5               | (-) 836.546                       | 0.0248                  | 0.0008 | 0.0033    | 0.0010 | 0.0014 | ↓**                                                       | ↑**                                                              | ↑   | ↑    |
| Histidine metabolism              | Urocanic acid         | (-) 137.035                       | 0.0137                  | 0.0246 | 0.0119    | 0.0071 | 0.0190 | ↑**                                                       | ↓**                                                              | ↓** | ↓    |
|                                   | Histidine             | (-) 154.062                       | 0.0030                  | 0.0105 | 0.0058    | 0.0069 | 0.0092 | ↑**                                                       | ↓*                                                               | ↓** | ↓    |
|                                   | Histamine             | (+) 112.087                       | 0.2223                  | 0.7793 | 0.5591    | 0.6005 | 0.5457 | ↑**                                                       | ↓                                                                | ↓   | ↓    |
| Amino acid<br>metabolism          | Alanine               | (+) 90.055                        | 0.0292                  | 0.0594 | 0.0389    | 0.0468 | 0.0318 | ↑**                                                       | ↓**                                                              | ↓   | ↓    |
|                                   | Threonine             | (+) 118.051                       | 0.0470                  | 0.1111 | 0.0665    | 0.1103 | 0.1391 | ↑**                                                       | ↓                                                                | ↓   | ↑    |
|                                   | Lysine                | (+) 147.113                       | 0.0064                  | 0.0189 | 0.0126    | 0.0195 | 0.0161 | ↑*                                                        | ↓                                                                | ↑   | ↓    |
|                                   | Phenylalanine         | (+) 120.080                       | 0.1127                  | 0.2429 | 0.1383    | 0.2071 | 0.1753 | ↑**                                                       | ↓**                                                              | ↓   | ↓    |
| Others                            | Isocitrate            | (-) 173.009                       | 0.0433                  | 0.0194 | 0.0548    | 0.2147 | 0.0562 | ↓                                                         | ↑**                                                              | ↑** | ↑*   |
|                                   | Citrate               | (+) 191.019                       | 0.0194                  | 0.0183 | 0.0265    | 0.2301 | 0.0251 | ↓                                                         | ↑                                                                | ↑** | ↑    |
|                                   | UDP-GlcNAc            | (-) 606.074                       | 0.0037                  | 0.0066 | 0.0065    | 0.0034 | 0.0077 | ↑                                                         | ↓                                                                | ↓*  | ↑    |
|                                   | Uric acid             | (-) 167.021                       | 0.0102                  | 0.0212 | 0.0115    | 0.0075 | 0.0133 | ↑**                                                       | ↓*                                                               | ↓** | ↓    |
|                                   | Lactic acid           | (-) 89.0244                       | 0.2902                  | 0.3570 | 0.2752    | 0.3487 | 0.3490 | ↑                                                         | ↓*                                                               | ↓   | ↓    |
|                                   |                       |                                   |                         |        |           |        |        |                                                           |                                                                  |     |      |

<sup>a</sup>Average values of relative abundance normalized by internal standard in each group. <sup>b</sup>Change trends in the DNCB group compared to the control group. <sup>c</sup>Change trends in the BS012 or dexamethasone treated group compared to the DNCB group. <sup>#</sup> $p < 0.05$ , <sup>##</sup> $p < 0.01$  vs. Control group; <sup>\*</sup> $p < 0.05$ , <sup>\*\*</sup> $p < 0.01$  vs. DNCB group, Dexa: Dexamethasone.

**Table S3.** List of the BS012-derived exogenous metabolites detected from skin tissue.

| Classification                 |                                            | Compounds                               | Retention time (min)                            | Molecular formula                               | Measured m/z       | Adduct                              | MS/MS fragment m/z (Relative intensity, %) |
|--------------------------------|--------------------------------------------|-----------------------------------------|-------------------------------------------------|-------------------------------------------------|--------------------|-------------------------------------|--------------------------------------------|
| <i>Cinnamomum cassia</i>       | Essential oil components                   | Cinnamaldehyde                          | 10.50                                           | C <sub>9</sub> H <sub>8</sub> O                 | 115.0543           | [M+H-H <sub>2</sub> O] <sup>+</sup> | 116 (100), 107 (80), 88 (75)               |
|                                |                                            | Methoxycinnamaldehyde                   | 10.06                                           | C <sub>10</sub> H <sub>10</sub> O <sub>2</sub>  | 163.0755           | [M+H] <sup>+</sup>                  | 135 (100), 145 (80), 107 (60)              |
|                                |                                            | Hydroxycinnamic acid                    | 7.94                                            | C <sub>9</sub> H <sub>8</sub> O <sub>3</sub>    | 147.0441           | [M-H] <sup>-</sup>                  | 119 (100)                                  |
|                                |                                            | Hydroxymethoxycinnamate                 | 7.30                                            | C <sub>10</sub> H <sub>10</sub> O <sub>4</sub>  | 177.0549           | [M+H-H <sub>2</sub> O] <sup>+</sup> | 177 (100)                                  |
|                                |                                            | Dimethoxycinnamic acid                  | 9.28                                            | C <sub>11</sub> H <sub>12</sub> O <sub>4</sub>  | 209.0813           | [M+H] <sup>+</sup>                  | 191 (100), 161 (20)                        |
|                                |                                            | Coumaraldehyde                          | 6.98                                            | C <sub>9</sub> H <sub>8</sub> O <sub>2</sub>    | 149.0598           | [M+H] <sup>+</sup>                  | 131 (100), 121 (100), 107 (40)             |
|                                |                                            | Coumaric acid                           | 7.94                                            | C <sub>9</sub> H <sub>8</sub> O <sub>3</sub>    | 163.0396           | [M-H] <sup>-</sup>                  | 119 (100)                                  |
|                                |                                            | Methylcoumarin                          | 8.96                                            | C <sub>10</sub> H <sub>10</sub> O <sub>3</sub>  | 161.0598           | [M+H-H <sub>2</sub> O] <sup>+</sup> | 161 (100)                                  |
|                                |                                            | Coumaroyl Hexoside                      | 7.18                                            | C <sub>15</sub> H <sub>18</sub> O <sub>8</sub>  | 325.0919           | [M-H] <sup>-</sup>                  | 163 (100), 119 (20)                        |
|                                |                                            | Dihydrocoumaroyl Hexo-side              | 6.98                                            | C <sub>15</sub> H <sub>20</sub> O <sub>8</sub>  | 327.1078           | [M-H] <sup>-</sup>                  | 165 (100)                                  |
|                                | Flavonoids                                 | Feruloyltyramine                        | 8.21                                            | C <sub>18</sub> H <sub>19</sub> NO <sub>4</sub> | 312.1231           | [M-H] <sup>-</sup>                  | 297 (100), 178 (90), 135 (40), 313 (30)    |
|                                |                                            | Kaempferol                              | 9.08                                            | C <sub>15</sub> H <sub>10</sub> O <sub>6</sub>  | 285.0393           | [M-H] <sup>-</sup>                  | 285 (100)                                  |
|                                |                                            | Isokaempferide                          | 8.07                                            | C <sub>16</sub> H <sub>12</sub> O <sub>6</sub>  | 299.0915           | [M-H] <sup>-</sup>                  | 255 (100), 271 (70), 284 (20)              |
|                                |                                            | Dihydrokaempferol                       | 7.70                                            | C <sub>15</sub> H <sub>12</sub> O <sub>6</sub>  | 287.0552           | [M-H] <sup>-</sup>                  | 259 (100), 243 (15)                        |
|                                |                                            | Kaempferol-3-O-glucoside-6"-p-coumaroyl | 8.69                                            | C <sub>30</sub> H <sub>26</sub> O <sub>13</sub> | 593.1278           | [M-H] <sup>-</sup>                  | 285 (100), 447 (10)                        |
|                                |                                            | Quercetin                               | 7.98                                            | C <sub>15</sub> H <sub>10</sub> O <sub>7</sub>  | 303.0506           | [M+H] <sup>+</sup>                  | 285 (100), 257 (80), 229 (40)              |
|                                |                                            | Dihydroquercetin                        | 7.19                                            | C <sub>15</sub> H <sub>12</sub> O <sub>7</sub>  | 303.0499           | [M-H] <sup>-</sup>                  | 285 (100), 177 (5), 125 (5)                |
|                                |                                            | Quercetin-3-O-pentoside                 | 7.83                                            | C <sub>20</sub> H <sub>18</sub> O <sub>11</sub> | 433.0757           | [M-H] <sup>-</sup>                  | 373 (100), 403 (50), 300 (30)              |
|                                |                                            | Quercetin-3-O-rhamnoside                | 8.03                                            | C <sub>21</sub> H <sub>20</sub> O <sub>11</sub> | 447.0916           | [M-H] <sup>-</sup>                  | 301 (100)                                  |
|                                |                                            | Quercetin-4'-O-glucoside                | 7.62                                            | C <sub>21</sub> H <sub>20</sub> O <sub>12</sub> | 463.0865           | [M-H] <sup>-</sup>                  | 301 (100)                                  |
| Polyphenols                    | Quercetin-3-O-deoxyhexo-syl(1-2) pentoside | 7.98                                    | C <sub>26</sub> H <sub>28</sub> O <sub>15</sub> | 579.1344                                        | [M-H] <sup>-</sup> | 300 (100)                           |                                            |
|                                | Syringaldehyde                             | 7.00                                    | C <sub>9</sub> H <sub>10</sub> O <sub>4</sub>   | 183.0654                                        | [M+H] <sup>+</sup> | 155 (100), 123 (20)                 |                                            |
| <i>Platycodon grandiflorum</i> | Triterpenoid saponins                      | Catechin                                | 6.57                                            | C <sub>15</sub> H <sub>14</sub> O <sub>6</sub>  | 289.0711           | [M-H] <sup>-</sup>                  | 245 (100), 205 (30)                        |
|                                |                                            | Platycodin D                            | 9.42                                            | C <sub>57</sub> H <sub>92</sub> O <sub>28</sub> | 1223.5704          | [M-H] <sup>-</sup>                  | 1224 (100)                                 |
|                                |                                            | Polygalacin D                           | 9.50                                            | C <sub>57</sub> H <sub>92</sub> O <sub>27</sub> | 1207.5752          | [M-H] <sup>-</sup>                  | 665 (100), 469 (65), 1117 (25)             |
|                                |                                            | Platyconic acid D                       | 9.44                                            | C <sub>54</sub> H <sub>84</sub> O <sub>26</sub> | 1147.5162          | [M-H] <sup>-</sup>                  | 1117 (100), 937 (85), 485 (20)             |
|                                |                                            | Platycosaponin A                        | 8.81                                            | C <sub>42</sub> H <sub>68</sub> O <sub>16</sub> | 827.4433           | [M-H] <sup>-</sup>                  | 828 (100), 665 (30)                        |
| <i>Asarum sieboldii</i>        | Lignan                                     | Sesamin                                 | 10.65                                           | C <sub>20</sub> H <sub>18</sub> O <sub>6</sub>  | 337.1080           | [M+H] <sup>+</sup>                  | 319 (100), 267 (45), 289 (35), 135 (20)    |
|                                | N-acyl amines                              | N-isobutyl-dodecatetrae-namide          | 11.34                                           | C <sub>16</sub> H <sub>25</sub> NO              | 248.2019           | [M+H] <sup>+</sup>                  | 149 (100), 142 (60)                        |
